# Supplementary material
Source: PubMed Central journal article supplement (PMC6533147)
Supplement: NIHMS1521381-supplement-Supplementary_Information.pdf [file NIHMS1521381-supplement-Supplementary_Information.pdf]

## SUPPLEMENTARY DATA

**Supplementary Table 2: Key Resources Table**

| REAGENT or RESOURCE                                                                                                                                                                                   | SOURCE                     | IDENTIFIER                                                         |
|-------------------------------------------------------------------------------------------------------------------------------------------------------------------------------------------------------|----------------------------|--------------------------------------------------------------------|
| <b>Bacterial and Virus Strains</b>                                                                                                                                                                    |                            |                                                                    |
| Nalidixic acid resistant derivative of <i>S. Typhimurium</i> ATCC14028                                                                                                                                | <sup>32</sup>              | IR715                                                              |
| <i>S. Typhimurium</i> IR715 <i>phoN::Cm</i>                                                                                                                                                           | <sup>33</sup>              | SW284                                                              |
| <i>E. cloacae</i> isolated from C57BL/6NHsd                                                                                                                                                           | This study                 | Hsd146                                                             |
| <i>K. oxytoca</i> isolated from C57BL/6NTac                                                                                                                                                           | This study                 | Tac148                                                             |
| <i>P. vulgaris</i> isolated from C57BL/6NTac                                                                                                                                                          | This study                 | Tac149                                                             |
| <i>P. mirabilis</i> isolated from C57BL/6NCrI                                                                                                                                                         | This study                 | CrI143                                                             |
| <i>E. coli</i> #1 isolated from C57BL/6NCrI                                                                                                                                                           | This study                 | CrI141                                                             |
| <i>E. coli</i> #2 isolated from C57BL/6NCrI                                                                                                                                                           | This study                 | CrI142                                                             |
| <i>E. coli</i> isolated from C57BL/6NHsd                                                                                                                                                              | This study                 | Hsd145                                                             |
| <i>E. coli</i> Nissle 1917 wild-type strain (O6:K5:H1)                                                                                                                                                | <sup>34</sup>              | EcN                                                                |
| <i>E. coli</i> Nissle 1917 <i>cydAB</i> mutant                                                                                                                                                        | <sup>19</sup>              | YL219                                                              |
| <i>E. coli</i> <i>zxx::RP4 2-(Tet<sup>r</sup>::Mu) (Kan<sup>r</sup>::Tn7) λpir</i>                                                                                                                    | <sup>35</sup>              | S17-1 λpir                                                         |
| <i>E. coli</i> K-12 strain TOP10; F <sup>-</sup> <i>mcrA</i> Δ( <i>mrr hsdRMS mcrBC</i> ) Φ80 <i>lacZ</i> ΔM15 <i>lacX74 recA1 araD139</i> Δ( <i>ara - leu</i> )7697 <i>galU galK rpsL endA1 nupG</i> | Invitrogen                 | One Shot® TOP10 Chemically Competent <i>E. coli</i> (Cat# C404010) |
| <b>Chemicals, Peptides, and Recombinant Proteins</b>                                                                                                                                                  |                            |                                                                    |
| PCR SuperMix High Fidelity                                                                                                                                                                            | Invitrogen                 | Cat # 10790020                                                     |
| <b>Critical Commercial Assays</b>                                                                                                                                                                     |                            |                                                                    |
| PowerSoil DNA Isolation                                                                                                                                                                               | MoBio                      | Cat# 12888-50                                                      |
| QIAquick PCR Purification Kit                                                                                                                                                                         | Qiagen                     | Cat# 28106                                                         |
| Gibson Assembly Master Mix                                                                                                                                                                            | NEB                        | Cat #E2611L                                                        |
| Zymoclean Gel DNA Recovery kit                                                                                                                                                                        | Zymogen                    | Cat #D4001                                                         |
| Qubit dsDNA HS Assay Kit                                                                                                                                                                              | Invitrogen                 | Cat# Q32854                                                        |
| TOPO cloning kit                                                                                                                                                                                      | Invitrogen                 | Cat# K456001                                                       |
| <b>Deposited Data</b>                                                                                                                                                                                 |                            |                                                                    |
| Raw and analyzed 16S rDNA Illumina sequencing data                                                                                                                                                    | This study                 | SRA accession number: SRP148888                                    |
| Raw and analyzed 16S rDNA Sanger sequencing data                                                                                                                                                      | This study                 | Genbank accession number: MH759762- MH759768                       |
| <b>Experimental Models: Organisms/Strains</b>                                                                                                                                                         |                            |                                                                    |
| Female wild-type VAF B6 mice                                                                                                                                                                          | Charles River Laboratories | Strain code: 027; C57BL/6CrI                                       |
| Female wild-type SPF B6 mice                                                                                                                                                                          | Envigo                     | C57BL/6Hsd                                                         |
| Female wild-type MPF B6 mice                                                                                                                                                                          | Taconic Biosciences        | C57BL/6NTac                                                        |
| Female wild-type SPF B6 mice                                                                                                                                                                          | The Jackson Laboratories   | Stock # 000664, C57BL/6J                                           |

|                                                                                                                             |                                                   |                           |
|-----------------------------------------------------------------------------------------------------------------------------|---------------------------------------------------|---------------------------|
| Female wild-type SPF B6 mice                                                                                                | The Jackson Laboratories                          | Stock # 005304, C57BL/6NJ |
| Germ-free Swiss Webster mice                                                                                                | Baumler Lab, University of California, Davis, USA | Tac:SW                    |
| Oligonucleotides                                                                                                            |                                                   |                           |
| Illumina 16S rRNA sequencing primer forward:<br>AATGATACGGCGACCACCGAGATCTACAC<br>NNNNNNNTATGGTAATTGT<br>GTGCCAGCMGCCGCGGTAA | 36                                                | 515F                      |
| Illumina 16S rRNA sequencing primer reverse:<br>CAAGCAGAAGACGGCATAACGAGAT<br>NNNNNNNAGTCAGTCAGCC<br>GGACTACHVGGGTWTCTAAT    | 36                                                | 806R                      |
| Full-length 16S rRNA forward sequencing primer;<br>5'-CAG GCC TAA CAC ATG CAA GTC-3'                                        | 37                                                | 63F                       |
| Full-length 16S rRNA reverse sequencing primer;<br>5'-GGG CGG WGT GTA CAA GGC-3                                             | 37                                                | 1387R                     |
| Primer for cloning <i>E. coli cydAB</i> genes (5'-ACGGTATCGATAAGCTTGATCGATAAAGCGGC TCTGTTAAATAAAATAC-3')                    | This study                                        | EcNcomp Fwd               |
| Primer for cloning <i>E. coli cydAB</i> genes (5'-CCGGGCTGCAGGAATTCGATTTAGTACAGAGA GTGGGTGTTAC -3')                         | This study                                        | EcNcomp Rev               |
| Recombinant DNA                                                                                                             |                                                   |                           |
| pWSK129::Ω cassette                                                                                                         | 38                                                | pCAL61                    |
| pWSK29::Ω cassette                                                                                                          | 38                                                | pCAL62                    |
| pCR2.1-TOPO                                                                                                                 | Invitrogen                                        | Cat# K4500-01             |
| pCR2.1-TOPO containing 16S gene insert from <i>E. cloacae</i> Hsd146                                                        | This study                                        | pEV176                    |
| pCR2.1-TOPO containing 16S gene insert from <i>E. cloacae</i> Tac148                                                        | This study                                        | pEV178                    |
| pCR2.1-TOPO containing 16S gene insert from <i>E. cloacae</i> Tac149                                                        | This study                                        | pEV179                    |
| pCR2.1-TOPO containing 16S gene insert from <i>E. cloacae</i> Cr1143                                                        | This study                                        | pEV173                    |
| pCR2.1-TOPO containing 16S gene insert from <i>E. cloacae</i> Cr1141                                                        | This study                                        | pEV171                    |
| pCR2.1-TOPO containing 16S gene insert from <i>E. cloacae</i> Cr1142                                                        | This study                                        | pEV172                    |
| pCR2.1-TOPO containing 16S gene insert from <i>E. cloacae</i> Hsd145                                                        | This study                                        | pEV176                    |
| pCR2.1-TOPO containing 16S gene insert from <i>E. coli</i> Nissle 1917                                                      | This study                                        | pEV216                    |
| pCR2.1-TOPO containing 16S gene insert from <i>S. Typhimurium</i> IR715                                                     | This study                                        | pEV218                    |
| pWSK129 containing <i>E. coli</i> Nissle 1917 <i>cydAB</i> genes                                                            | This study                                        | pBMM17                    |

| Software and Algorithms                                |                                                                                                                                               |                                                                                                                                   |
|--------------------------------------------------------|-----------------------------------------------------------------------------------------------------------------------------------------------|-----------------------------------------------------------------------------------------------------------------------------------|
| Excel for Mac 2011                                     | Microsoft                                                                                                                                     | <a href="http://www.microsoft.com/Buy/Excel">www.microsoft.com/Buy/Excel</a>                                                      |
| Excel for Windows 2010                                 | Microsoft                                                                                                                                     | <a href="http://www.microsoft.com/Buy/Excel">www.microsoft.com/Buy/Excel</a>                                                      |
| Prism V7.0                                             | Graph Pad                                                                                                                                     | <a href="https://www.graphpad.com/scientific-software/prism/">https://www.graphpad.com/scientific-software/prism/</a>             |
| Snappene 4.1.5 for macOS                               | Snappene                                                                                                                                      | <a href="http://www.snappene.com/products/snappene/about_snappene/">http://www.snappene.com/products/snappene/about_snappene/</a> |
| NIH nucleotide BLAST                                   | National Center for Biotechnology Information                                                                                                 | <a href="https://blast.ncbi.nlm.nih.gov/Blast.cgi">https://blast.ncbi.nlm.nih.gov/Blast.cgi</a>                                   |
| MEGA (version 7 for macOS)                             | Kumar S, 2016 ( <a href="https://academic.oup.com/mbe/article/33/7/1870/2579089">https://academic.oup.com/mbe/article/33/7/1870/2579089</a> ) | <a href="http://www.megasoftware.net/">http://www.megasoftware.net/</a>                                                           |
| R version 3.4.3                                        | R Core Team (2013)                                                                                                                            | <a href="http://cran.us.r-project.org/">http://cran.us.r-project.org/</a>                                                         |
| DADA2 R Package (1.6)                                  | 39                                                                                                                                            | <a href="https://benjjneb.github.io/dada2/index.html">https://benjjneb.github.io/dada2/index.html</a>                             |
| QIIME V1.91                                            | 40                                                                                                                                            | <a href="http://qiime.org/install/install.html">http://qiime.org/install/install.html</a>                                         |
| QIIME V2.0                                             | 40                                                                                                                                            | <a href="https://qiime2.org/">https://qiime2.org/</a>                                                                             |
| Greengenes Database version 13_8                       | 41                                                                                                                                            | <a href="http://greengenes.secondgenome.com/">http://greengenes.secondgenome.com/</a>                                             |
| Ribosomal Database Project Release 11                  | 42                                                                                                                                            | <a href="https://rdp.cme.msu.edu/">https://rdp.cme.msu.edu/</a>                                                                   |
| Linear discriminant analysis (LDA) effect size (LEfSe) | 43                                                                                                                                            | <a href="http://huttenhower.sph.harvard.edu/galaxy">http://huttenhower.sph.harvard.edu/galaxy</a>                                 |

## Supplementary Figures

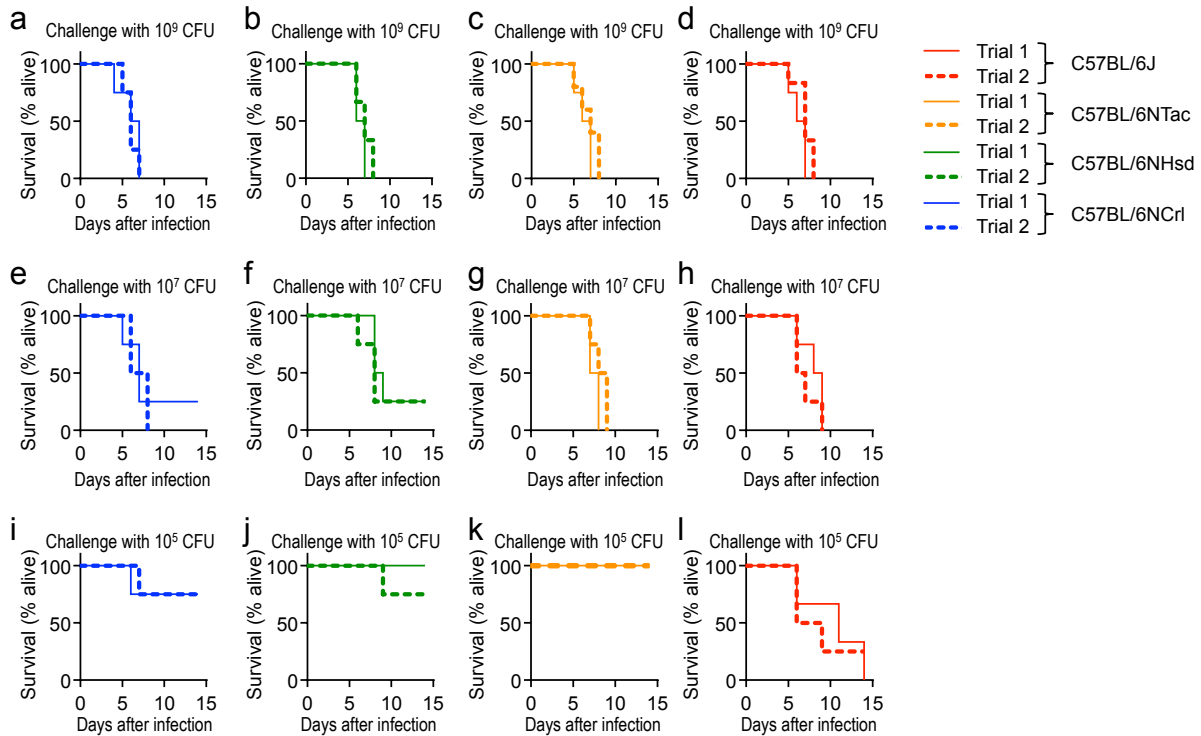

**Supplementary Figure 1: Vendors are a dominant source of variation in lethal morbidity during *Salmonella* infection. Related to Figure panels 1a-c.** (a-l) Mice from Charles River Laboratories (C57BL/6NCrl) (a, e and i), Harlan (C57BL/6NHsd) (b, f and j), Taconic Farms (C57BL/6NTac) (c, g and k) or Jackson Laboratories (C57BL/6J) (d, h, and l) were challenged with 10<sup>9</sup> (a-d), 10<sup>7</sup> (e-h) or 10<sup>5</sup> CFU of *S. Typhimurium* per animal (i-l). Lethal morbidity was monitored at the indicated time points after challenge. The experiment was repeated one year apart (*n* is given in Supplementary Figure 2) and results from both trials (trial 1, solid lines; trial 2, dashed lines) are included in the same figure panel for comparison. Results of a statistical analysis are provided in **Supplementary Table 1**.

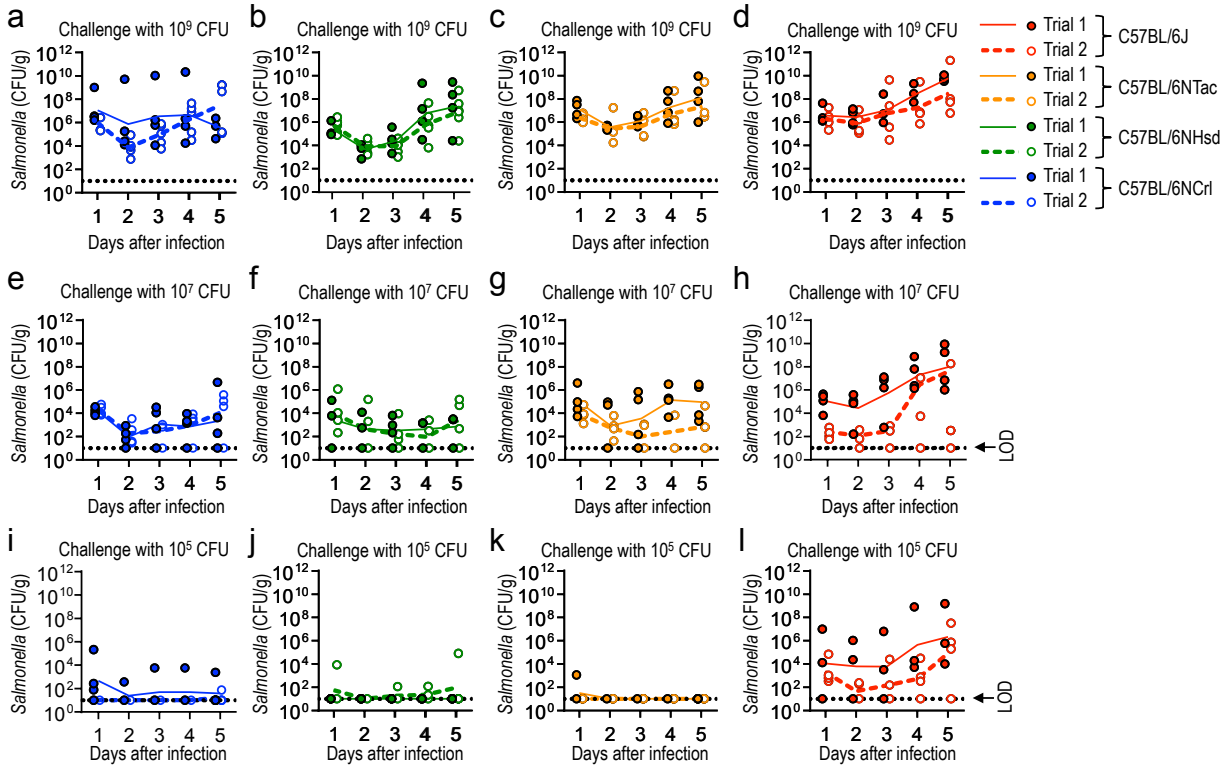

**Supplementary Figure 2: Vendors are a dominant source of variation in intestinal colonization during *Salmonella* infection. Related to Figure panels 1d-f.** (a-l) Mice from Charles River Laboratories (C57BL/6NCrI) (a, e and i), Harlan (C57BL/6NHsd) (b, f and j), Taconic Farms (C57BL/6NTac) (c, g and k) or Jackson Laboratories (C57BL/6J) (d, h, and l) were challenged with  $10^9$  (a-d),  $10^7$  (e-h) or  $10^5$  CFU of *S. Typhimurium* per animal (i-l). Fecal shedding of *S. Typhimurium* was quantified at the indicated time points after challenge. The experiment was repeated one year apart and results from both trials (trial 1, closed circles and solid lines; trial 2, open circles and dashed lines) are included in the same figure panel for comparison. Trend lines represent geometric means and each dot represents data from one animal ( $n$ ). LOD, limit of detection. Results of a statistical analysis are provided in **Supplementary Table 1**.

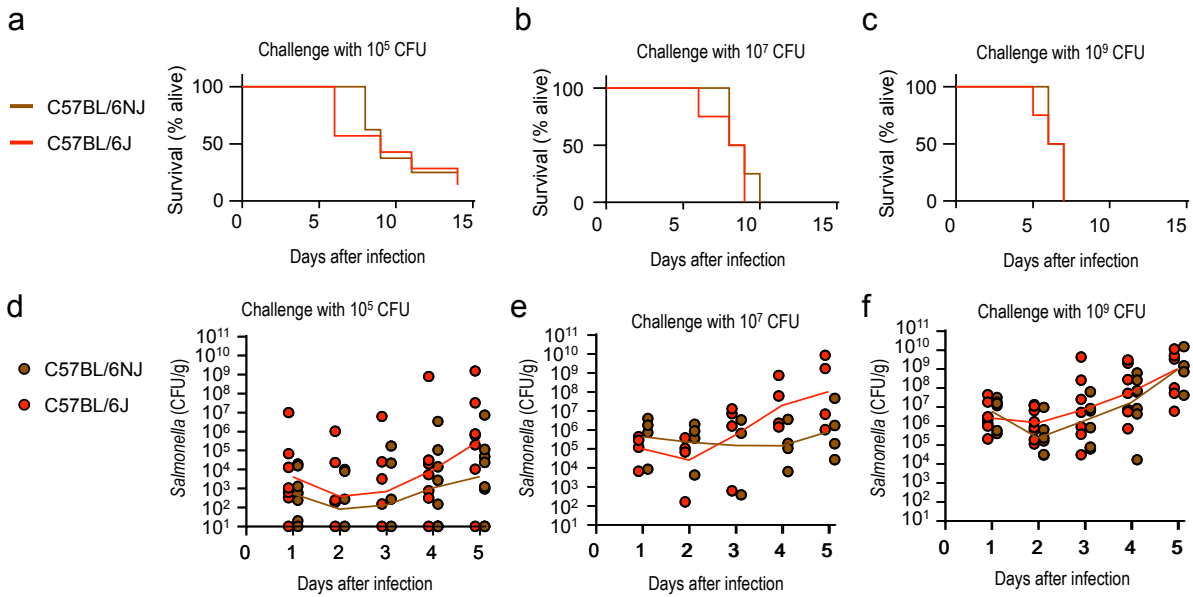

**Supplementary Figure 3: Genetic variation between C57BL/6 substrains is not a dominant source of phenotypic variation during *Salmonella* infection. Related to Figure panel 1h. (a-f) Two C57BL/6 substrains (C57BL/6J and C57BL/6NJ) from Jackson Laboratories were challenged with  $10^5$  (a and d),  $10^7$  (b and e) or  $10^9$  CFU (c and f) of *S. Typhimurium* per animal. (a-c) Development of lethal morbidity over time was recorded. (e-f) Fecal shedding of *S. Typhimurium* was quantified at the indicated time points after challenge. Trend lines represent geometric means and each dot represents data from one animal ( $n$ ). Results of a statistical analysis are provided in **Supplementary Table 1**.**

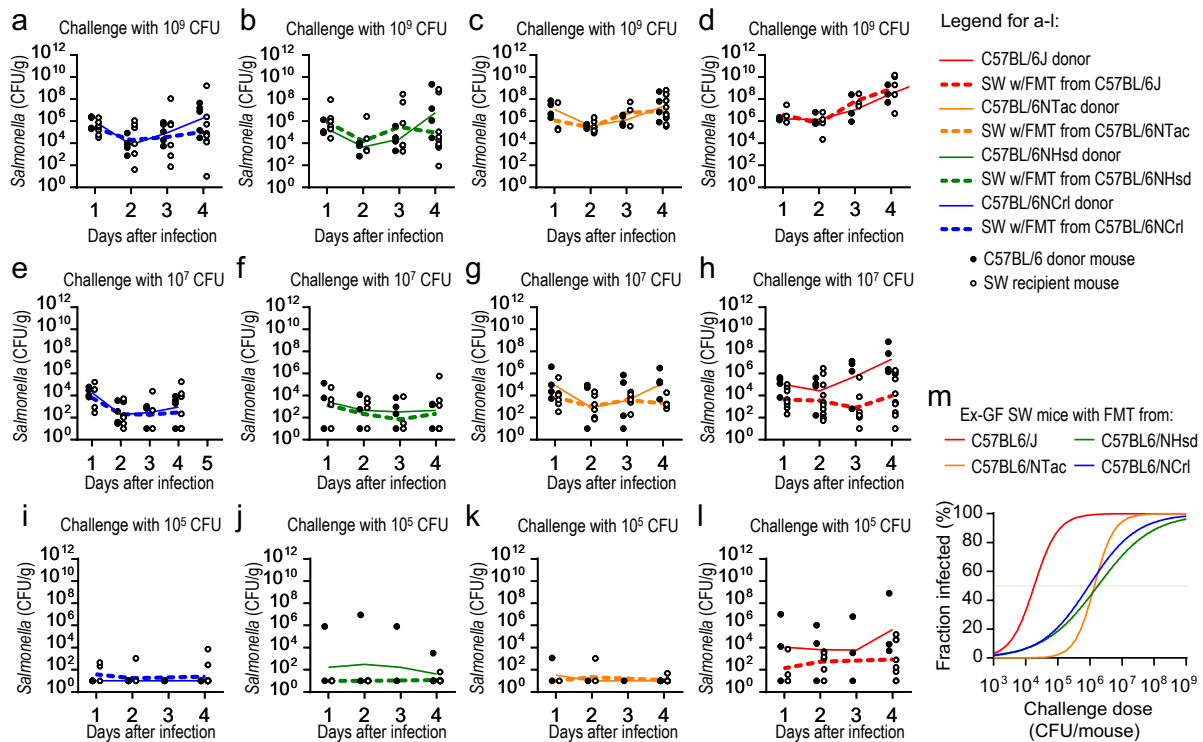

**Supplementary Figure 4: Germ-free mice receiving a fecal microbiota transplant phenocopy the variation in *S. Typhimurium* intestinal colonization observed in donor mice. Related to Figure panels 2a-e.** (a-l) Germ-free Swiss Webster mice received fecal microbiota transplants from Charles River mice (C57BL/6NCrI) (a, e and i), Harlan mice (C57BL/6NHsd) (b, f and j), Taconic mice (C57BL/6NTac) (c, g and k) or Jackson mice (C57BL/6J) (d, h, and l). Mice were then challenged with  $10^9$  (a-d),  $10^7$  (e-h) or  $10^5$  CFU of *S. Typhimurium* per animal (i-l). Fecal shedding of *S. Typhimurium* was quantified at the indicated time points after challenge (open circles and dotted lines). For comparison, fecal shedding of the respective donor mice challenged with the same dose of *S. Typhimurium* (closed circles and solid lines) from the experiment shown in Extended Data Figure 3 were included in each figure panel. Trend lines represent geometric means and each dot represents data from one animal. (m) Fraction of ex-germ-free SW mice developing intestinal carriage at different *S. Typhimurium* challenge doses. Results of a statistical analysis are provided in **Supplementary Table 1**.

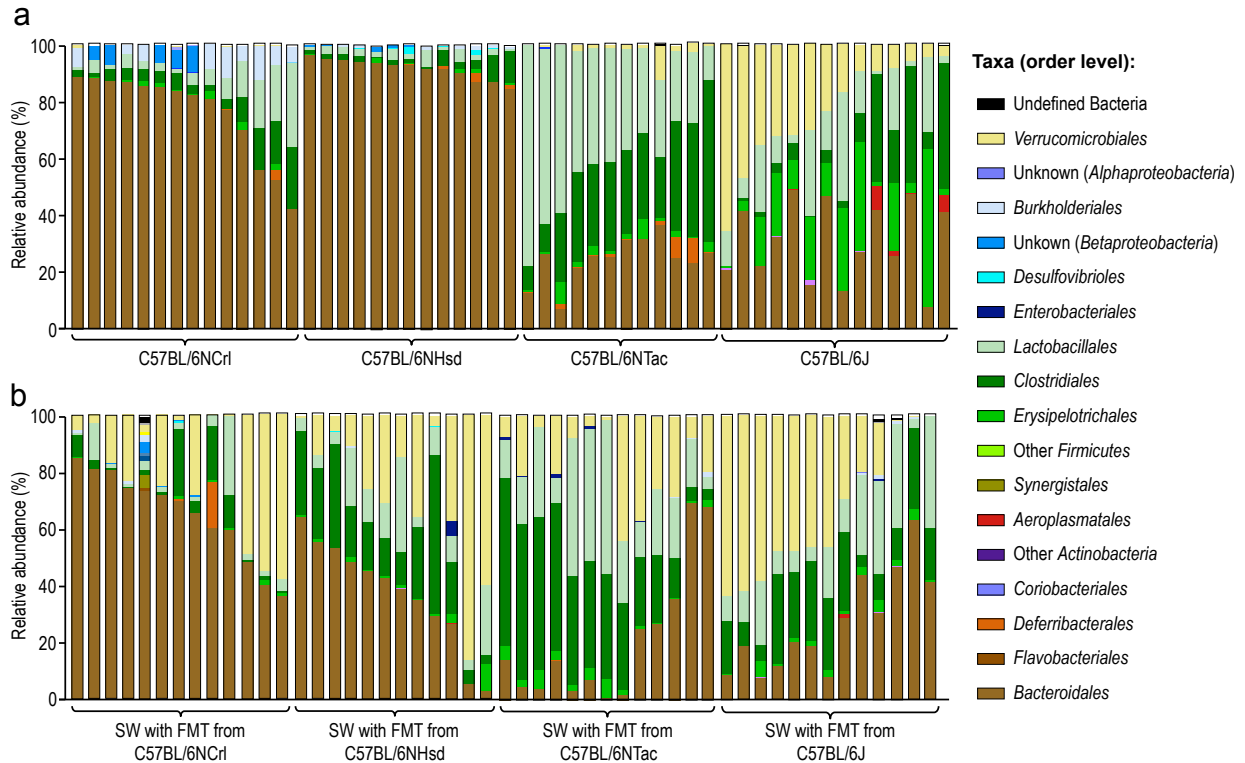

**Supplementary Figure 5: The relative abundance of *Clostridiales* is not a source of phenotypic variation in *Salmonella* susceptibility. Related to Figure panel 2g. (a) Fecal pellets were collected from Charles River mice (C57BL/6NCrI), Harlan mice (C57BL/6NHsd), Taconic mice (C57BL/6NTac) or Jackson mice (C57BL/6J) and subjected to 16S profiling. (b) Germ-free Swiss Webster (SW) mice received a pooled fecal microbiota transplant (FMT) from Charles River mice (C57BL/6NCrI), Harlan mice (C57BL/6NHsd), Taconic mice (C57BL/6NTac) or Jackson mice (C57BL/6J) and fecal pellets were collected five days later from each mouse for 16S profiling. (a and b) Graphs show relative taxa abundance at the order level. Each bar represents data from one animal (*n*). Results of a statistical analysis are provided in **Supplementary Table 1**.**



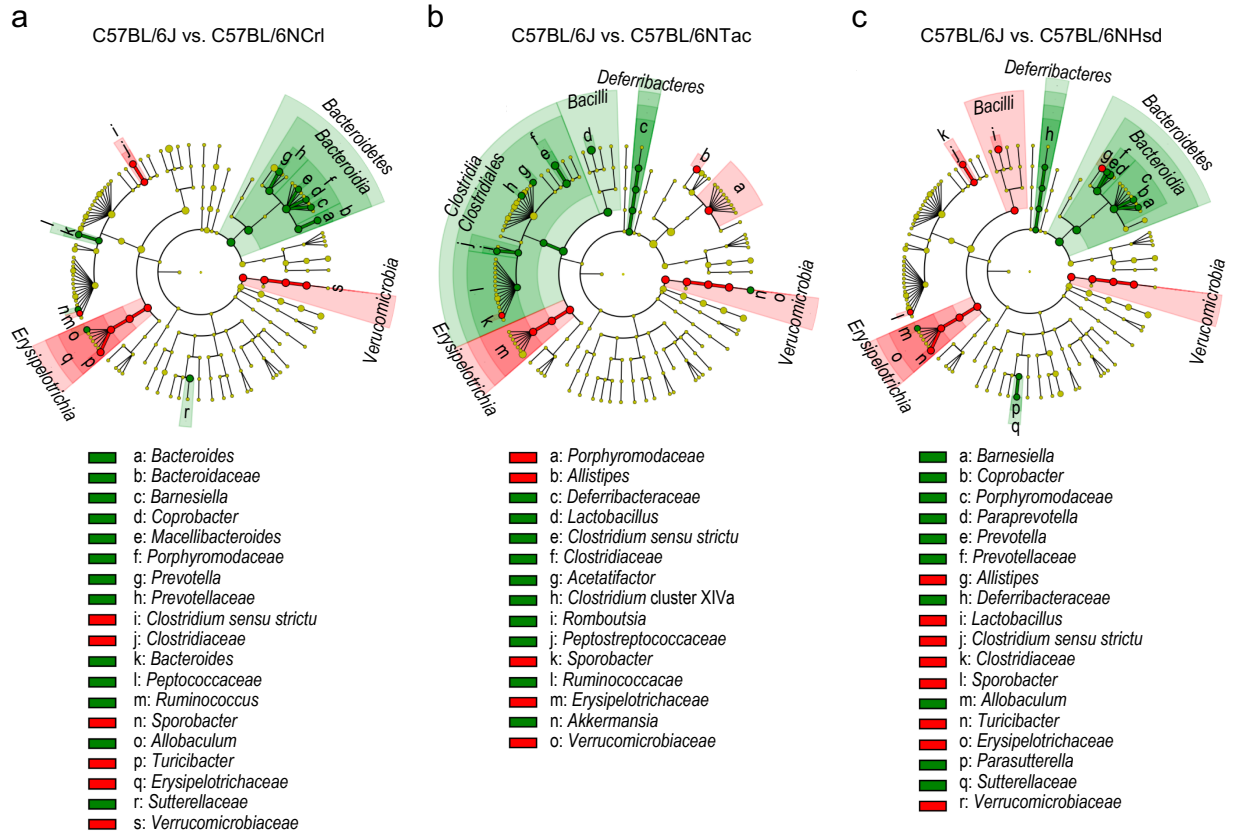

**Supplementary Figure 6: Detection of differences in the microbiota composition by linear discriminant analysis. Related to Figure panel 1i.** (a-c) Cladograms show differences in taxa composition between Jackson mice (C57BL/6J) and Charles River mice (C57BL/6NCr) (a), between Jackson mice (C57BL/6J) and Taconic mice (C57BL/6NTac) (b), or between Jackson mice (C57BL/6J) and Harlan mice (C57BL/6NHsd) (c). Taxa that are more abundant in resistant mice (C57BL/6NCr, C57BL/6NTac, or C57BL/6NHsd) compared to susceptible mice (C57BL/6J) are shown in green. Taxa less abundant in resistant mice (C57BL/6NCr, C57BL/6NTac, or C57BL/6NHsd) compared to susceptible mice (C57BL/6J) are shown in red.

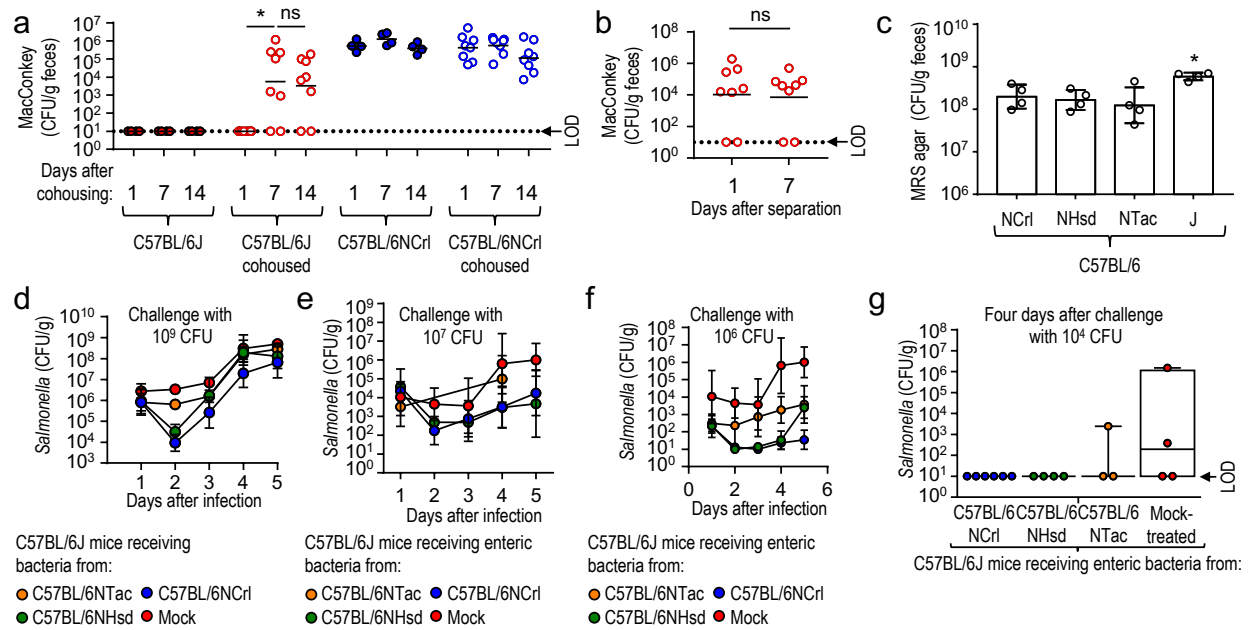

**Supplementary Figure 7: *Enterobacteriaceae* are keystone species responsible for**

**phenotypic variation. Related to Figure 3.** (a) Mice from Jackson Laboratories (C57BL/6J) (red circles) or Charles River (C57BL/6NCrI) (blue circles) were housed normally (closed circles) or were cohoused (open circles). The presence of enteric bacteria in feces was determined by spreading dilutions of fecal homogenates on MacConkey agar plates at the indicated time points. Lines indicate the geometric mean of CFU recovered from feces. (b) Cohoused C57BL/6J mice from panel a were separated from C57BL/6NCrI mice and the presence of *Enterobacteriaceae* in feces was determined at the indicated time points after separation. Lines indicate the geometric mean of CFU recovered from feces. (c) The presence of *Lactobacilli* in feces of uninfected mice from the indicated vendors was determined by spreading dilutions of fecal homogenates on MRS agar plates. Bars represent the geometric mean  $\pm$  geomean standard deviation. (d-g) Mice from Jackson Laboratories (C57BL/6J) were mock-treated or received enteric bacteria from the indicated donor mice. Mice were challenged with  $10^9$  ( $n = 4$ ) (d),  $10^7$  ( $n = 3-4$ ) (e),  $10^6$  ( $n = 3-4$ ) (f) or  $10^4$  (each dot represents data from one animal) (g) CFU of *S. Typhimurium* per animal and *S. Typhimurium* shedding with the feces was monitored at the indicated time points after challenge

(d, e, and f) or at four days after challenge (g). (a, b and g) Each dot represents data from one animal ( $n$ ). (d-f) Trend lines represent geometric means  $\pm$  geomean standard error. (g) Whiskers represent minimum to maximum points and the box extends from the 25th to 75th percentile with median plotted by a line. Bars represent geometric means  $\pm$  geomean standard deviation. Each dot represents data from a biological repeat ( $n$ ). Results of a statistical analysis are provided in **Supplementary Table 1**. LOD, limit of detection; ns,  $P > 0.05$ ; \*,  $P \leq 0.05$ .

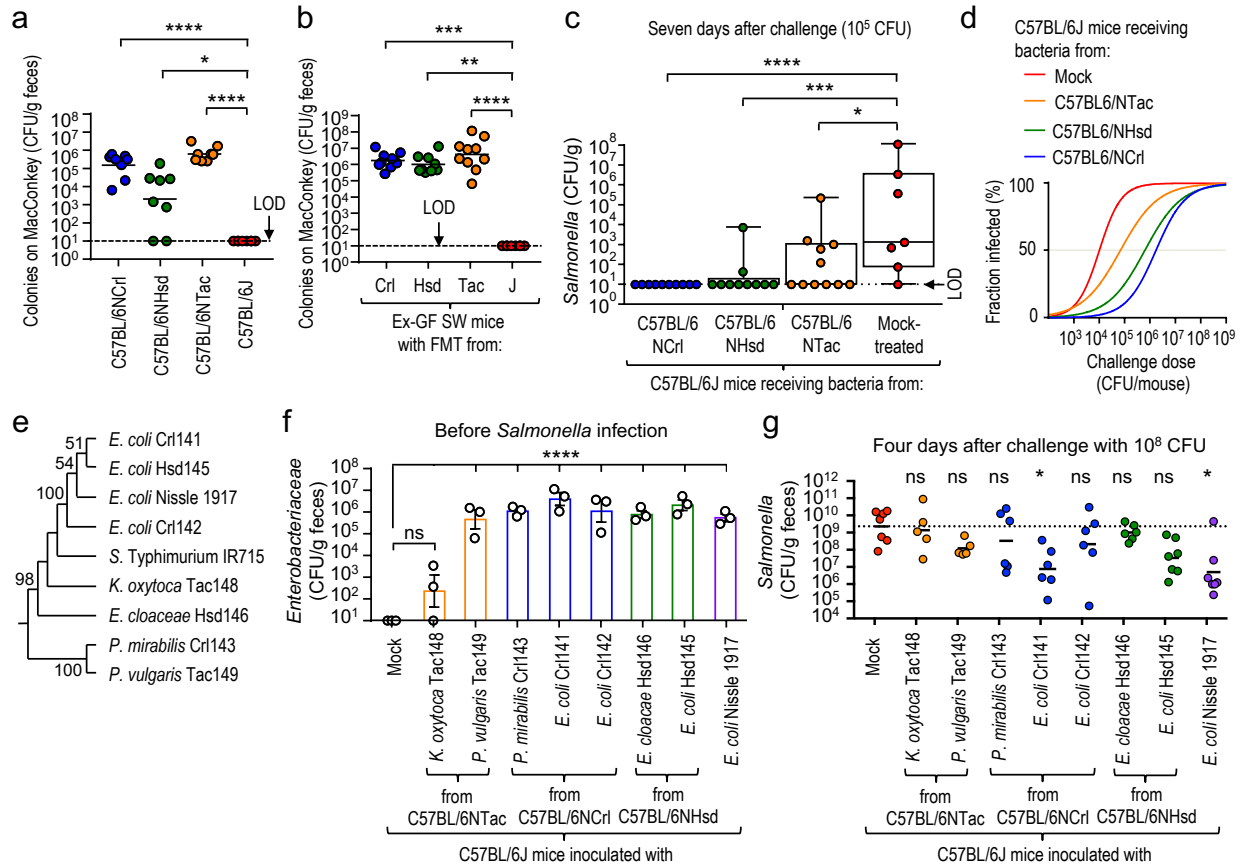

**Supplementary Figure 8: Endogenous *Enterobacteriaceae* are keystone species responsible for phenotypic variation. Related to Figure 3.** (a) The presence of *Enterobacteriaceae* in feces of uninfected C57BL/6 mice from different vendors was determined by spreading dilutions on MacConkey agar plates. (b) Germ-free Swiss Webster (SW) mice received fecal microbiota transplants (ex-germ-free SW mice) from the indicated donor mice and the presence of *Enterobacteriaceae* in feces was determined by spreading dilutions on MacConkey agar plates. (a-b) A line indicated the geometric mean. (c-d) Mice from Jackson Laboratories (C57BL/6J) were mock-treated or received *Enterobacteriaceae* from the indicated donor mice. (c) *S. Typhimurium* shedding with the feces was monitored at the indicated time points after challenge with  $10^5$  CFU per animal. Whiskers represent minimum to maximum points and the box extends from the 25th to 75th percentile with median plotted by a line. (d) Fraction of mice developing intestinal carriage after challenge with different *S. Typhimurium* doses ( $n = 4-11$

per dose). (e) 16S rRNA gene sequences of *S. Typhimurium* strain IR715, *E. coli* strain Nissle 1917 and *Enterobacteriaceae* isolated from mice (C57BL/6NCrl, C57BL/6NHsd or C57BL/6NTac) were compared using a maximum likelihood model. (f and g) Mice from Jackson Laboratories (C57BL/6J) were inoculated with the indicated *Enterobacteriaceae*. (f) The presence of *Enterobacteriaceae* in feces prior to challenge was determined by spreading dilutions on MacConkey agar plates ( $n = 3$ ). Bars represent the geometric mean  $\pm$  geometric standard deviation. (g) Mice were challenged with *S. Typhimurium* and shedding of the pathogen with the feces was determined four days later. Lines indicate the geometric mean. (a, b, c, f and g) Each dot represents data from one animal, thus indicating the number ( $n$ ) of repeats. LOD, limit of detection; ns,  $P > 0.05$ ; \*,  $P \leq 0.01$ ; \*\*\*,  $P \leq 0.001$ ; \*\*\*\*,  $P \leq 0.0001$ .

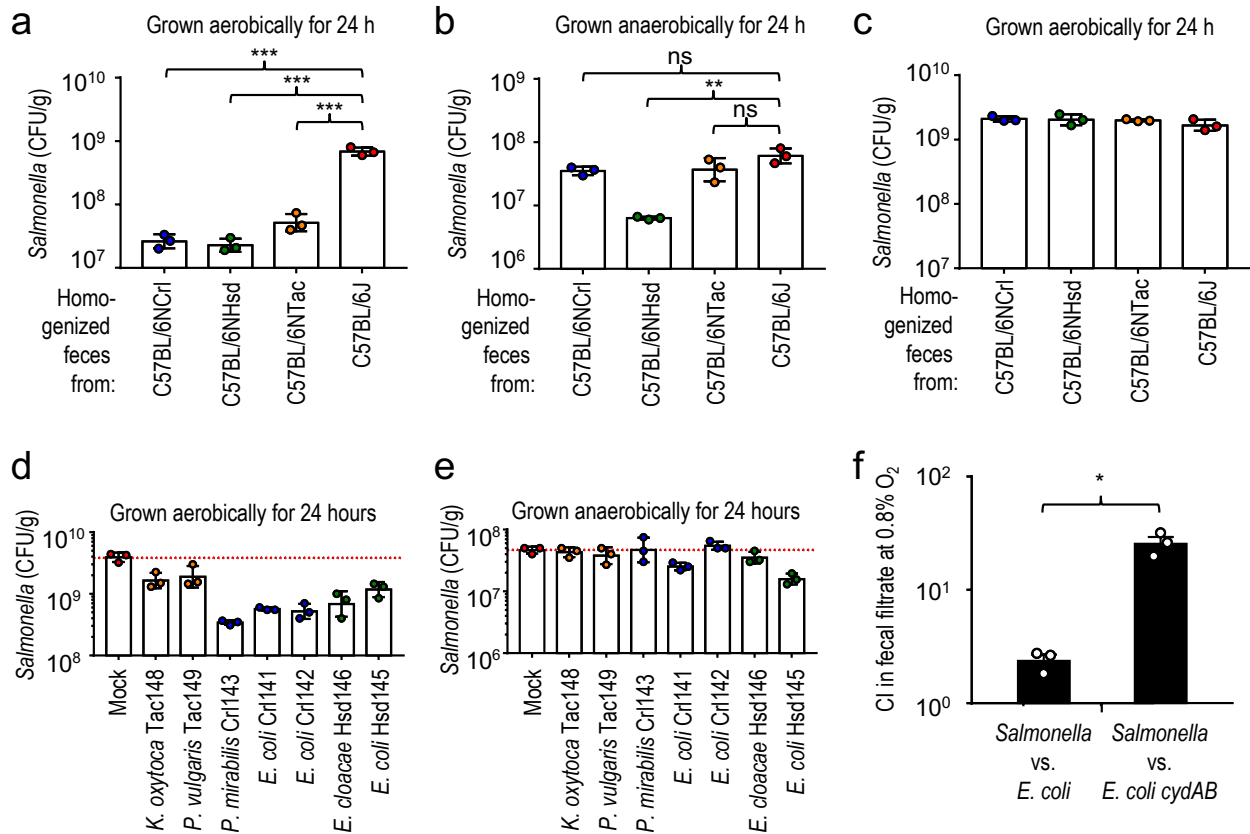

**Supplementary Figure 9: *Enterobacteriaceae* attenuate growth of *S. Typhimurium* in feces under aerobic conditions *in vitro*. Related to Figure 3.** (a-c) Fecal pellets collected from Charles River mice (C57BL/6NCrI), Harlan mice (C57BL/6NHsd), Taconic mice (C57BL/6NTac) or Jackson mice (C57BL/6J) were homogenized. Homogenates were inoculated with *S. Typhimurium* and pathogen growth determined after aerobic incubation (a) or anaerobic incubation (b) for 24 hours ( $n = 3$  per replicate). (c) Homogenates were sterile filtered and pathogen growth determined after aerobic incubation for 24 hours ( $n = 3$  per replicate). (d and e) Fecal pellets collected from Jackson mice (C57BL/6J) were homogenized and mock-treated or inoculated with the indicated *Enterobacteriaceae* isolates. Each homogenate was then infected with *S. Typhimurium* and pathogen growth determined after aerobic incubation for 24 hours (d) or after anaerobic incubation for 24 hours ( $n = 3$  per replicate) (e). (d and e) A red dotted line indicates pathogen growth in mock-treated fecal homogenates. (f) Fecal pellets collected from

Jackson mice (C57BL/6J) were homogenized, sterile filtered and inoculated with the indicated mixtures of *S. Typhimurium* and *E. coli* Nissle 1917 strains. The competitive index (CI) was calculated after growth for 24 hour in a hypoxia chamber with 0.8% oxygen. (a-f) Data represent geometric means  $\pm$  geomean standard deviation. Each dot represents data from a biological repeat (*n*). Results of a statistical analysis are provided in **Supplementary Table 1**. LOD, limit of detection; ns,  $P > 0.05$ ; \*,  $P < 0.05$ ; \*\*,  $P < 0.01$ ; \*\*\*,  $P < 0.005$ .
